# Supplementary material for: Simple method for simultaneous detection of uric acid, xanthine and hypoxanthine in fish samples using a glassy carbon electrode modified with as commercially received multiwalled carbon nanotubes
Source: Royal Society of Chemistry journal article supplement (doi:10.1039/c1ay05065f), 2011-01-01
Supplement: c1ay05065f.pdf [file c1ay05065f.pdf]

## Supporting Information

### Simple method for simultaneous detection of uric acid, xanthine, and hypoxanthine in fish samples using as commercially received multiwalled carbon nanotube modified electrode

Annamalai Senthil Kumar\* and Ranganathan Shanmugam

Environmental and Analytical Chemistry Division, School of Advanced Sciences,  
Vellore Institute of Technology University, Vellore 632 014, India

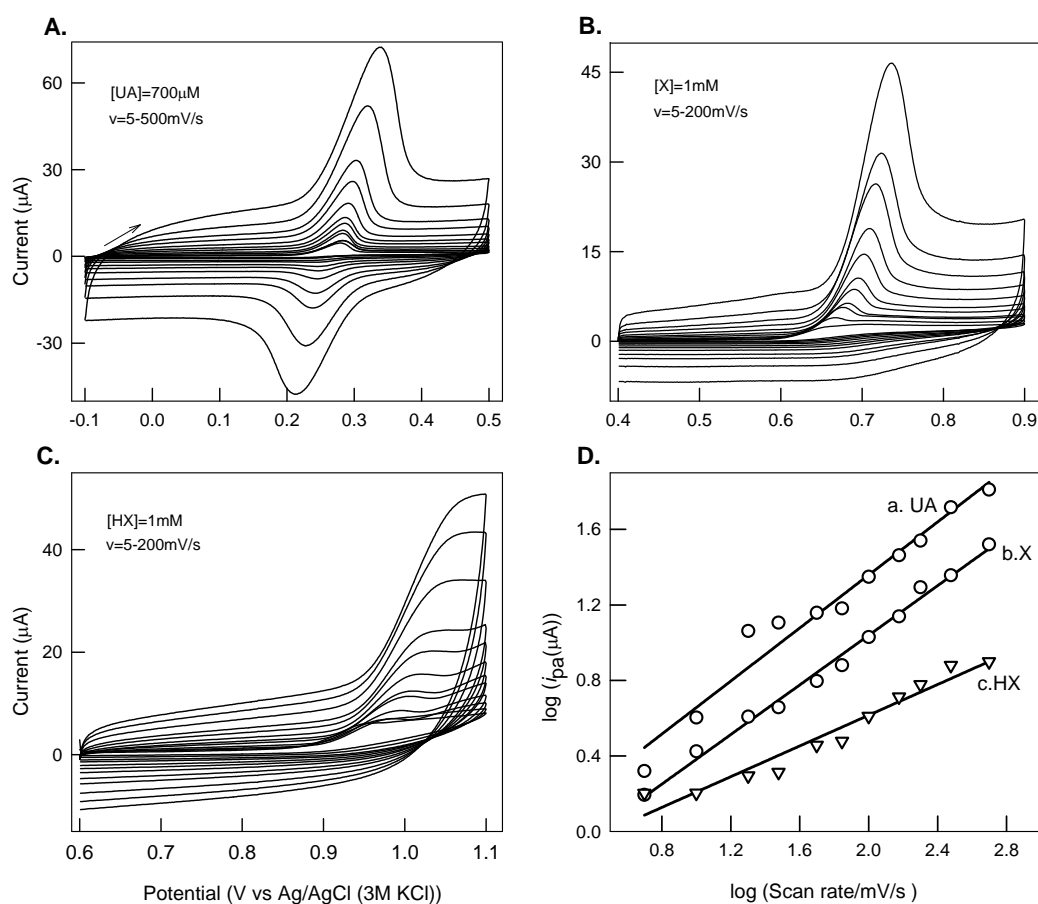

**Figure S1.** CV of Uric acid (A) , Xanthine (B) and hypoxanthine (C) on GCE/MWCNT in pH 7.14 PB solution at a scan rate of 50 mV/s. (D) Plots of double logarithmic response of  $i_{\text{pa}}$  vs scan rate for the three compounds.

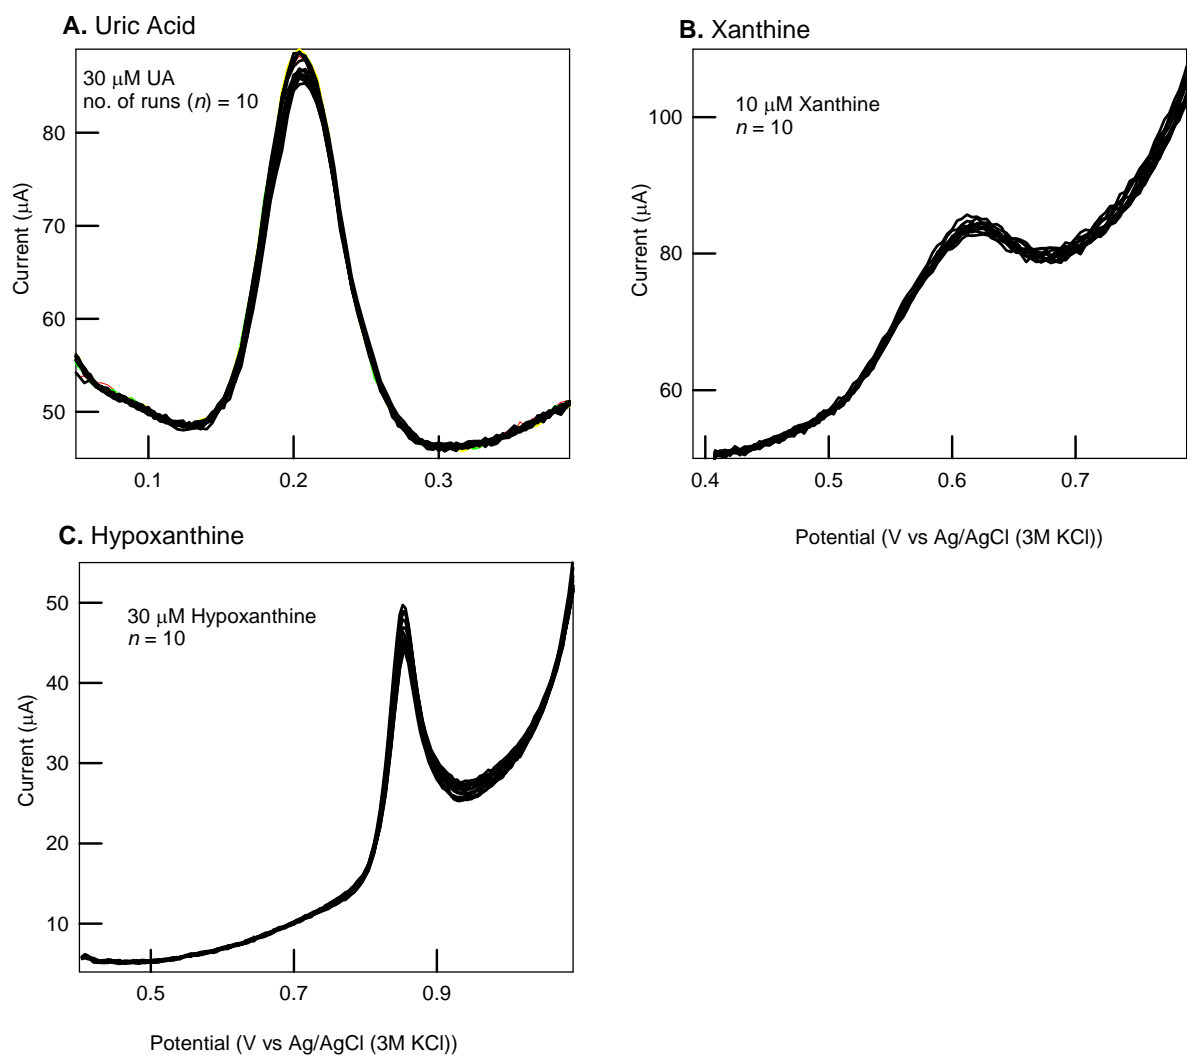

**Figure S2.** Ten continuous DPV of uric acid (A), xanthine (B) and hypoxanthine (C) on GCE/MWCNT in pH 7.14 PB solution. Other DPV conditions as in the Figure 2.
